# Supplementary material for: Distinct hierarchical alterations of intrinsic neural timescales account for different manifestations of psychosis
Source: eLife. 2020 Oct 27;9:e56151. doi: 10.7554/eLife.56151 (PMC7591251; doi:10.7554/eLife.56151)
Supplement: Table 1—source data 1. [file elife-56151-table1-data1.xlsx]

## Sheet: Master_Sheet
				male = 1
dataset	subject		age	gender	dx	delusions	conceptual dis	hallucinations	blunted affect	emotional withdrawal	social withdrawal	alogia	thorazine equivalents	FD
BrainGluSchi	A00019803		56	1	Schizophrenia_Broad	2	0	2	3	4	3	2	300	0.186263
BrainGluSchi	A00019612		21	1	Schizophrenia_Broad	2	0	3	0	2	2	0	450	0.142275
BrainGluSchi	A00019365		48	1	Schizophrenia_Broad	4	0	0	0	0	0	0	520	0.122156
BrainGluSchi	A00018851		49	1	Schizophrenia_Broad	2	3	4	2	3	2	1	33.5	0.109364
BrainGluSchi	A00018235		25	1	Schizophrenia_Broad	3	0	0	0	3	0	0	100	0.116456
BrainGluSchi	A00000844		29	1	Schizophrenia_Broad	2	0	1	4	3	4	4	0	0.438071
BrainGluSchi	A00017896		48	0	Schizophrenia_Broad	0	1	3	0	0	0	0	80.4	0.210571
BrainGluSchi	A00016806		29	1	Schizophrenia_Broad	5	0	0	2	0	0	0	33.5	0.0998375
BrainGluSchi	A00013446		33	1	Schizophrenia_Broad	0	0	1	4	4	3	2	307	0.187685
BrainGluSchi	A00013748		26	1	Schizophrenia_Broad	0	0	4	2	2	3	0	200	0.101008
BrainGluSchi	A00000865		44	1	Schizophrenia_Broad	4	2	4	5	3	5	3	1400	0.194279
BrainGluSchi	A00004289		59	1	Schizophrenia_Broad	3	0	0	0	0	0	0	1330	0.158764
BrainGluSchi	A00008203		36	1	Schizophrenia_Broad	2	0	3	2	2	3	3	300	0.186332
BrainGluSchi	A00008015		23	1	Schizophrenia_Broad	1	0	2	5	1	2	1	600	0.198862
BrainGluSchi	A00007883		56	0	Schizophrenia_Broad	0	0	2	0	1	2	0	50	0.122252
BrainGluSchi	A00011115		19	1	Schizophrenia_Broad	0	0	0	3	2	2	4	600	0.204326
BrainGluSchi	A00009642		21	1	Schizophrenia_Broad	0	0	0	0	2	1	0	400	0.152549
BrainGluSchi	A00002191		16	1	Schizophrenia_Broad	4	1	4	2	1	2	2	0	0.142804
BrainGluSchi	A00005037		19	1	Schizophrenia_Broad	2	1	2	2	1	1	1	300	0.134325
BrainGluSchi	A00025493		27	1	Schizophrenia_Broad	3	4	3	2	3	1	3	600	0.155421
BrainGluSchi	A00007470		23	1	Schizophrenia_Broad	1	0	0	1	0	0	0	150	0.147401
BrainGluSchi	A00012986		27	1	Schizophrenia_Broad	4	2	2	1	2	2	0	320	0.106428
BrainGluSchi	A00003158		65	1	Schizophrenia_Broad	NaN	NaN	NaN	NaN	NaN	NaN	NaN	NaN	0.192269
BrainGluSchi	A00021676		23	1	Schizophrenia_Broad	2	1	3	1	2	2	0	200	0.112722
BrainGluSchi	A00027498		27	1	Schizophrenia_Broad	1	0	0	3	1	1	0	300	0.0992731
BrainGluSchi	A00028507		20	1	Schizophrenia_Broad	1	0	1	0	0	0	1	60	0.106561
BrainGluSchi	A00028599		26	1	Schizophrenia_Broad	3	2	3	3	3	2	4	240	0.153533
BrainGluSchi	A00030933		30	1	Schizophrenia_Broad	0	0	0	5	3	3	4	150	0.183232
BrainGluSchi	A00031831		19	1	Schizophrenia_Broad	3	2	3	1	2	2	0	NaN	0.195999
BrainGluSchi	A00033766		19	1	Schizophrenia_Broad	4	2	4	3	3	2	4	NaN	0.111793
BrainGluSchi	A00037137		26	1	Schizophrenia_Broad	1	0	2	1	1	0	0	NaN	0.116009
BrainGluSchi	A00035915		20	1	Schizophrenia_Broad	5	1	5	0	3	1	0	NaN	0.0916244
BrainGluSchi	A00036653		40	1	Schizophrenia_Broad	4	2	4	1	0	2	0	120	0.134136
BrainGluSchi	A00036652		32	1	Schizophrenia_Broad	5	3	2	4	4	5	5	240	0.146227
BrainGluSchi	A00036847		29	1	Schizophrenia_Broad	4	0	4	3	2	2	2	NaN	0.221536
BrainGluSchi	A00037871		21	1	Schizophrenia_Broad	3	1	0	2	2	5	0	300	0.21121
BrainGluSchi	A00038122		30	1	Schizophrenia_Broad	3	1	4	2	0	0	0	NaN	0.14161
BrainGluSchi	A00038585		28	1	Schizophrenia_Broad	0	0	0	0	2	2	3	33.5	0.0747081
BrainGluSchi	A00038770		22	1	Schizophrenia_Broad	3	4	4	0	1	3	3	300	0.140433
BrainGluSchi	A00039190		34	1	Schizophrenia_Broad	2	4	2	0	1	2	0	286.55	0.167558
COBRE	A00021598		19	1	Schizophrenia_Strict	0	1	0	1	2	1	0	100	0.08692
COBRE	A00009280		23	1	Schizophrenia_Strict	0	1	0	3	2	1	2	600	0.187419
COBRE	A00023246		25	1	Schizophrenia_Strict	0	0	3	2	2	0	2	900	0.106743
COBRE	A00018403		29	1	Schizophrenia_Strict	1	0	3	5	4	5	5	600	0.253965
COBRE	A00016720		40	1	Schizophrenia_Strict	3	2	2	0	1	1	0	240	0.177969
COBRE	A00021591		19	1	Schizophrenia_Strict	1	0	2	2	1	1	2	300	0.0941131
COBRE	A00020602		22	1	Schizophrenia_Strict	5	2	4	0	1	2	0	600	0.294969
COBRE	A00027410		27	1	Schizophrenia_Strict	1	0	0	3	1	1	0	300	0.185269
COBRE	A00028408		28	1	Schizophrenia_Strict	0	1	1	1	1	1	1	640	0.132068
COBRE	A00004507		57	1	Schizophrenia_Strict	1	0	0	2	0	0	0	300	0.172728
COBRE	A00028805		20	1	Schizophrenia_Strict	1	0	1	0	0	0	1	60	0.100754
COBRE	A00028806		26	1	Schizophrenia_Strict	3	2	3	3	3	2	4	240	0.241811
COBRE	A00035003		26	1	Schizophrenia_Strict	1	0	2	1	1	0	0	nan	0.126198
COBRE	A00035836		35	0	Schizoaffective	2	2	3	2	2	0	2	175	0.224574
COBRE	A00037224		32	1	Schizophrenia_Strict	5	2	1	2	5	5	3	640	0.175402
COBRE	A00038441		52	1	Schizophrenia_Strict	1	4	1	4	1	2	3	50	0.159574
COBRE	A00014830		32	0	Schizophrenia_Strict	2	0	3	2	1	2	0	175	0.106879
COBRE	A00024959		34	1	Schizophrenia_Strict	0	0	0	0	0	0	0	515	0.225319
COBRE	A00024568		20	0	Schizophrenia_Strict	0	0	0	1	1	0	1	75	0.0962676
COBRE	A00024228		56	0	Schizophrenia_Strict	0	0	0	0	0	0	0	25	0.210323
COBRE	A00024198		55	1	Schizophrenia_Strict	3	0	3	4	0	3	0	320	0.121981
COBRE	A00016197		21	1	Schizophrenia_Strict	0	0	0	0	0	0	0	100	0.194604
COBRE	A00023158		20	1	Schizophrenia_Strict	3	0	0	0	0	2	0	240	0.11857
COBRE	A00020787		22	0	Schizophrenia_Strict	3	0	2	3	0	2	1	nan	0.156997
COBRE	A00023590		22	1	Schizophrenia_Strict	3	0	4	0	1	1	0	940	0.209193
COBRE	A00024684		24	1	Schizophrenia_Strict	3	0	3	0	0	0	0	300	0.185413
COBRE	A00000838		29	1	Schizophrenia_Strict	0	0	0	1	3	2	2	1000	0.25522
COBRE	A00014607		29	1	Schizophrenia_Strict	4	0	3	1	0	0	1	33.5	0.133808
COBRE	A00001251		53	1	Schizophrenia_Strict	2	1	2	1	2	2	2	75	0.199387
COBRE	A00015201		25	1	Schizophrenia_Strict	2	1	3	2	0	2	0	300	0.209075
COBRE	A00028404		23	1	Schizophrenia_Strict	2	0	3	4	1	3	4	600	0.123699
NMorphCH	CH3183		31	1	Schizophrenia_Strict	3	0	1	0	0	0	3	312	0.167246
NMorphCH	CH8959a		25	1	Schizoaffective	0	0	0	4	4	2	2	NaN	0.0603245
NMorphCH	CH7272b		30	1	Schizophrenia_Strict	4	0	3	0	5	5	0	600	0.0855638
NMorphCH	CH7724b		39	0	Schizophrenia_Strict	2	4	0	2	4	2	2	400	0.195217
NMorphCH	CH8883a		31	1	Schizophrenia_Strict	0	0	0	3	4	3	2	400	0.122447
NMorphCH	CH7539a		23	1	Schizophrenia_Strict	4	2	4	5	0	5	5	266	0.0545252
NMorphCH	CH8941a		38	1	Schizophrenia_Strict	5	4	5	2	0	3	0	NaN	0.151577
NMorphCH	CH7307a		34	1	Schizophrenia_Strict	3	0	0	0	2	0	0	400	0.131558
NMorphCH	CH8266b		32	0	Schizophrenia_Strict	0	0	0	4	5	5	0	266	0.0656519
NMorphCH	CH8201a		32	1	Schizophrenia_Strict	3	0	3	3	4	4	2	100	0.0982107
NMorphCH	CH7316a		35	0	Schizophrenia_Strict	5	2	5	2	0	1	2	1066	0.0758142
NMorphCH	CH8639a		42	1	Schizophrenia_Strict	2	2	2	4	5	5	5	200	0.0806874
NMorphCH	CH8541b		38	1	Schizophrenia_Strict	5	3	5	5	5	5	0	400	0.149651
NMorphCH	CH7098a		20	1	Schizophrenia_Strict	5	3	4	5	4	5	5	333	0.188504
NMorphCH	CH8043b		34	1	Schizophrenia_Strict	4	2	4	5	5	5	1	NaN	0.126083
NMorphCH	CH7259b		32	1	Schizophrenia_Strict	4	2	3	4	4	4	3	300	0.0953195
NMorphCH	CH8930a		40	1	Schizophrenia_Strict	2	0	0	2	4	3	0	nan	0.0991487
NMorphCH	CH7718b		33	1	Schizophrenia_Strict	5	4	5	4	5	4	4	300	0.14383
NMorphCH	CH7176a		29	0	Schizophrenia_Strict	4	4	4	5	5	3	0	300	0.23407
NMorphCH	CH8335b		23	1	Schizophrenia_Strict	5	3	5	5	5	4	4	nan	0.147408
NMorphCH	CH8410a		22	0	Schizophrenia_Strict	5	3	5	4	3	3	2	500	0.0420591
NMorphCH	CH8937a		24	1	Schizophrenia_Strict	5	3	4	4	4	0	0	nan	0.110026
NMorphCH	CH8519a		22	0	Schizophrenia_Strict	5	3	5	3	3	5	3	125	0.299368
NMorphCH	CH7614b		26	0	Schizophrenia_Strict	2	0	3	3	3	1	4	533	0.0923739
NMorphCH	CH7831a		25	1	Schizophrenia_Strict	0	2	0	5	3	3	5	nan	0.141171
NMorphCH	CH7510b		33	1	Schizophrenia_Strict	0	5	5	3	3	3	0	nan	0.091456
UCLA	sub-50005		40	1	SCHZ	2	0	3	2	0	5	1	583	0.185272
UCLA	sub-50008		48	1	SCHZ	0	2	0	2	3	2	0	133	0.138633
UCLA	sub-50013		30	1	SCHZ	1	2	0	0	1	0	0	300	0.131738
UCLA	sub-50014		22	1	SCHZ	3	0	3	2	1	0	2	266	0.145192
UCLA	sub-50015		23	1	SCHZ	2	0	2	1	1	1	0	133	0.0842582
UCLA	sub-50021		41	0	SCHZ	4	0	5	3	4	2	2	133	0.0519769
UCLA	sub-50023		49	0	SCHZ	4	1	4	1	4	4	0	200	0.0891258
UCLA	sub-50027		30	0	SCHZ	1	1	3	0	3	4	2	900	0.168646
UCLA	sub-50034		43	1	SCHZ	3	0	4	2	3	2	0	666	0.0829105
UCLA	sub-50035		29	0	SCHZ	3	4	3	0	1	3	0	0	0.142293
UCLA	sub-50036		32	1	SCHZ	4	3	0	2	3	4	2	532	0.141583
UCLA	sub-50038		26	0	SCHZ	0	0	0	0	1	1	1	27	0.136319
UCLA	sub-50043		40	1	SCHZ	5	3	5	0	3	4	0	0	0.0901642
UCLA	sub-50047		44	1	SCHZ	2	1	3	1	3	3	2	3200	0.138386
UCLA	sub-50048		43	1	SCHZ	4	3	2	2	4	5	3	300	0.18853
UCLA	sub-50050		23	1	SCHZ	3	1	2	3	3	2	2	200	0.126231
UCLA	sub-50051		37	1	SCHZ	2	4	0	0	2	4	0	200	0.0828902
UCLA	sub-50053		47	1	SCHZ	3	0	0	1	2	3	0	33	0.0932999
UCLA	sub-50054		23	1	SCHZ	1	1	1	0	0	0	0	400	0.14066
UCLA	sub-50055		23	1	SCHZ	0	0	0	0	0	0	0	1000	0.136427
UCLA	sub-50056		49	0	SCHZ	2	0	3	4	4	3	3	333	0.147539
UCLA	sub-50058		38	0	SCHZ	3	3	3	1	0	1	0	150	0.24238
UCLA	sub-50060		41	1	SCHZ	4	4	1	0	4	5	0	600	0.205912
UCLA	sub-50064		31	0	SCHZ	2	1	3	0	1	2	0	0	0.184247
UCLA	sub-50066		33	1	SCHZ	3	2	2	0	0	2	0	433	0.141709
UCLA	sub-50073		47	1	SCHZ	4	3	3	0	4	4	0	0	0.0681898
UCLA	sub-50075		33	1	SCHZ	1	1	0	0	4	4	3	300	0.151159
UCLA	sub-50077		29	1	SCHZ	4	3	4	1	4	4	2	0	0.101264
UCLA	sub-50081		32	1	SCHZ	4	0	3	2	4	4	2	1466	0.0818024
UCLA	sub-50085		25	1	SCHZ	1	0	4	2	3	3	1	nan	0.130996
dataset	N		age	gender	dx	delusions	conceptual dis	hallucinations	blunted affect	emotional withdrawal	social withdrawal	alogia	thorazine equivalents	FD
BrainGluSchi	40	Means	31.125	38		2.25641	0.948718	2.07692	1.76923	1.76923	1.84615	1.33333	312.256	0.155447
COBRE	31		30.4839	26		1.67742	0.612903	1.67742	1.6129	1.16129	1.32258	1.16129	360.121	0.16991
NMorphCH	26		30.5	19		3.15385	1.96154	2.88462	3.30769	3.42308	3.19231	2.07692	377.833	0.124973
UCLA	30		35.0333	22		2.5	1.43333	2.2	1.06667	2.33333	2.7	0.933333	430.621	0.131658
ALL	127		31.7638	105		2.35714	1.19048	2.1746	1.88095	2.09524	2.19841	1.34921	367.311	0.147119
BrainGluSchi		Standard Deviations	12.5865	95		1.60128	1.27628	1.6122	1.59706	1.24523	1.4242	1.62761	322.27	0.060042
COBRE			11.8768	83.871		1.51409	0.989189	1.39969	1.45321	1.26746	1.37567	1.43983	285.523	0.0550984
NMorphCH			6.21128	73.0769		1.89087	1.6366	2.04601	1.59422	1.70113	1.69751	1.87453	215.047	0.0585494
UCLA			8.8726	73.3333		1.4081	1.43078	1.62735	1.14269	1.5162	1.57896	1.11211	633.712	0.0436219
ALL			10.5736	82.6772		1.66115	1.40692	1.69743	1.64247	1.6121	1.64934	1.56623	406.619	0.0571378
t-test			0.344622	0.532043										0.00235652
				male = 1
dataset	subject		age	gender	dx	delusions	conceptual dis	hallucinations	blunted affect	emotional withdrawal	social withdrawal	alogia	thorazine equivalents	FD
BrainGluSchi	A00026996		27	1	control									0.151636
BrainGluSchi	A00017937		29	1	control									0.172472
BrainGluSchi	A00010443		22	1	control									0.157892
BrainGluSchi	A00003162		18	1	control									0.16769
BrainGluSchi	A00012180		27	1	control									0.125045
BrainGluSchi	A00017368		18	1	control									0.0968575
BrainGluSchi	A00003413		26	1	control									0.188829
BrainGluSchi	A00007745		21	1	control									0.136654
BrainGluSchi	A00020883		48	1	control									0.142218
BrainGluSchi	A00022515		48	1	control									0.129363
BrainGluSchi	A00020630		40	1	control									0.164226
BrainGluSchi	A00037139		35	1	control									0.132651
BrainGluSchi	A00013059		55	1	control									0.198255
BrainGluSchi	A00011415		34	0	control									0.184668
BrainGluSchi	A00024113		51	1	control									0.130234
BrainGluSchi	A00028885		22	1	control									0.113062
BrainGluSchi	A00037136		54	1	control									0.187427
BrainGluSchi	A00034096		59	1	control									0.172509
BrainGluSchi	A00034389		27	0	control									0.103611
BrainGluSchi	A00034392		29	1	control									0.0633125
BrainGluSchi	A00035022		39	1	control									0.218373
BrainGluSchi	A00035552		41	1	control									0.191274
BrainGluSchi	A00036668		38	1	control									0.146973
BrainGluSchi	A00037200		57	1	control									0.196069
COBRE	A00023131		36	1	control									0.225136
COBRE	A00028052		34	0	control									0.132563
COBRE	A00028409		31	1	control									0.163684
COBRE	A00029226		37	0	control									0.0904596
COBRE	A00029452		39	1	control									0.135867
COBRE	A00035751		42	1	control									0.163577
COBRE	A00036844		55	1	control									0.187026
COBRE	A00037238		38	1	control									0.176001
COBRE	A00037495		49	1	control									0.106598
COBRE	A00037665		43	1	control									0.19696
COBRE	A00014898		27	1	control									0.0840243
COBRE	A00024663		63	1	control									0.171915
COBRE	A00024932		25	0	control									0.151028
COBRE	A00024820		34	1	control									0.0947888
COBRE	A00025969		26	1	control									0.187513
COBRE	A00024301		25	0	control									0.047078
COBRE	A00024372		23	1	control									0.126786
COBRE	A00024160		23	1	control									0.200317
COBRE	A00024535		26	1	control									0.134118
COBRE	A00023866		23	1	control									0.120294
COBRE	A00023800		48	1	control									0.140165
COBRE	A00023848		38	1	control									0.0881583
COBRE	A00022915		45	1	control									0.200855
COBRE	A00022687		18	0	control									0.0876356
COBRE	A00023095		21	1	control									0.0931805
COBRE	A00022810		35	0	control									0.25649
COBRE	A00022509		27	1	control									0.0762362
COBRE	A00022837		26	1	control									0.130354
COBRE	A00022400		25	1	control									0.0918218
COBRE	A00021058		37	1	control									0.159212
COBRE	A00026945		39	1	control									0.12696
COBRE	A00021081		24	1	control									0.0831818
COBRE	A00020895		43	1	control									0.125531
COBRE	A00020805		27	1	control									0.138439
COBRE	A00020968		29	0	control									0.109822
COBRE	A00020984		31	1	control									0.181949
COBRE	A00023337		21	1	control									0.183877
COBRE	A00002198		35	1	control									0.135406
COBRE	A00011265		22	0	control									0.151383
COBRE	A00012995		49	1	control									0.188078
COBRE	A00007409		48	1	control									0.184468
COBRE	A00000300		36	1	control									0.17642
NMorphCH	CH2917		28	1	control									0.0962258
NMorphCH	CH8357		25	0	control									0.0837038
NMorphCH	CH1840		28	1	control									0.0921255
NMorphCH	CH7869b		33	0	control									0.0552381
NMorphCH	CH8284b		24	1	control									0.0783013
NMorphCH	CH8593b		24	1	control									0.0862575
NMorphCH	CH7202b		25	0	control									0.0745142
NMorphCH	CH7172a		31	1	control									0.0616167
NMorphCH	CH8413a		23	1	control									0.129246
NMorphCH	CH8301a		23	1	control									0.0605491
NMorphCH	CH8126b		28	1	control									0.0650494
NMorphCH	CH8095a		30	0	control									0.172442
NMorphCH	CH7683a		20	1	control									0.0656701
NMorphCH	CH8860b		27	1	control									0.102325
NMorphCH	CH8033a		28	0	control									0.0810186
NMorphCH	CH7567b		45	1	control									0.319845
NMorphCH	CH7930a		23	0	control									0.119993
NMorphCH	CH8402b		34	1	control									0.168555
NMorphCH	CH8461a		42	1	control									0.101837
NMorphCH	CH8698b		30	0	control									0.187112
NMorphCH	CH8914b		33	0	control									0.49356
NMorphCH	CH7814b		46	1	control									0.149587
NMorphCH	CH7317b		21	1	control									0.405136
NMorphCH	CH8350b		40	0	control									0.0785305
NMorphCH	CH8041b		35	1	control									0.145374
UCLA	sub-10206		21	1	control									0.0715509
UCLA	sub-10225		35	1	control									0.139835
UCLA	sub-10227		31	0	control									0.0561838
UCLA	sub-10235		22	1	control									0.15236
UCLA	sub-10249		28	1	control									0.116266
UCLA	sub-10273		30	0	control									0.0672947
UCLA	sub-10274		43	1	control									0.0738168
UCLA	sub-10280		27	1	control									0.0832589
UCLA	sub-10290		48	1	control									0.19218
UCLA	sub-10292		49	1	control									0.118097
UCLA	sub-10321		34	1	control									0.140894
UCLA	sub-10329		22	1	control									0.112025
UCLA	sub-10339		45	0	control									0.181364
UCLA	sub-10340		32	1	control									0.095547
UCLA	sub-10345		25	1	control									0.0616535
UCLA	sub-10356		43	0	control									0.116998
UCLA	sub-10376		42	0	control									0.110963
UCLA	sub-10377		49	1	control									0.155995
UCLA	sub-10388		50	0	control									0.0858567
UCLA	sub-10438		25	1	control									0.144558
UCLA	sub-10448		37	1	control									0.0784941
UCLA	sub-10455		25	1	control									0.198382
UCLA	sub-10471		30	0	control									0.0526109
UCLA	sub-10487		31	1	control									0.104361
UCLA	sub-10506		25	1	control									0.142639
UCLA	sub-10523		24	1	control									0.0406935
UCLA	sub-10525		24	1	control									0.0772783
UCLA	sub-10527		24	1	control									0.145907
UCLA	sub-10530		23	1	control									0.059652
UCLA	sub-10557		26	1	control									0.0607518
UCLA	sub-10570		32	0	control									0.121328
UCLA	sub-10575		23	1	control									0.124886
UCLA	sub-10624		28	1	control									0.0969228
UCLA	sub-10629		31	1	control									0.102452
UCLA	sub-10672		29	1	control									0.0582033
UCLA	sub-10697		39	1	control									0.0748873
UCLA	sub-10707		28	1	control									0.0996858
UCLA	sub-10708		25	1	control									0.0885024
UCLA	sub-10746		23	1	control									0.0788306
UCLA	sub-10779		38	1	control									0.0766269
UCLA	sub-10785		36	0	control									0.0865843
UCLA	sub-10788		35	0	control									0.0996644
UCLA	sub-10844		26	1	control									0.0575708
UCLA	sub-10855		47	1	control									0.0801122
UCLA	sub-10871		41	1	control									0.0553977
UCLA	sub-10877		23	1	control									0.0671438
UCLA	sub-10940		25	1	control									0.0747902
UCLA	sub-10949		27	1	control									0.146955
UCLA	sub-10968		24	1	control									0.093117
UCLA	sub-10975		32	1	control									0.137457
UCLA	sub-10977		47	1	control									0.194628
UCLA	sub-11019		47	1	control									0.132059
UCLA	sub-11030		40	1	control									0.11348
UCLA	sub-11044		40	1	control									0.0596916
UCLA	sub-11052		26	1	control									0.0338944
UCLA	sub-11068		39	1	control									0.0756957
UCLA	sub-11090		24	1	control									0.0529341
UCLA	sub-11097		43	1	control									0.0974489
UCLA	sub-11098		39	1	control									0.0341544
UCLA	sub-11104		21	1	control									0.107098
UCLA	sub-11106		27	1	control									0.104124
UCLA	sub-11122		40	0	control									0.146817
UCLA	sub-11128		28	0	control									0.0995465
UCLA	sub-11131		38	0	control									0.0723608
UCLA	sub-11142		24	1	control									0.102549
UCLA	sub-11143		28	1	control									0.0496618
UCLA	sub-11149		32	1	control									0.119264
dataset	N		age	gender	dx	delusions	conceptual dis	hallucinations	blunted affect	emotional withdrawal	social withdrawal	alogia	thorazine equivalents	FD
BrainGluSchi	24	Means	36.0417	22										0.152971
COBRE	42		33.881	34										0.142985
NMorphCH	25		29.84	16										0.138952
UCLA	67		32.3134	54										0.0993134
ALL	158		32.9051	126										0.125345
BrainGluSchi		Standard Deviations	13.0766	91.6667										0.0373951
COBRE			10.3669	80.9524										0.0456781
NMorphCH			7.24385	64										0.110231
UCLA			8.47493	80.597										0.0391023
ALL			9.73325	79.7468										0.0613883

## Sheet: COBRE_demographics
	IQ	education	employment
A00021598	118	3	7
A00009280	119	4	5
A00023246	74	2	7
A00018403	102	4	5
A00016720	134	4	3
A00021591	117	4	7
A00020602	105	4	7			Your highest level of Education		CODEM_5	grade 6 or less	1
A00027410	123	4	6						grade 7 - 12 (without graduating high school)	2
A00028408	104	3	6						graduated high school or high school equivalent	3
A00004507	100	4	5						part college	4
A00028805	95	3	4						graduated 2 yr college	5
A00028806	87	2	6						graduated 4 yr college	6
A00035003	119	3	5						part graduate/professional school	7
A00035836	111	3	7						completed graduate/professional school	8
A00037224	65	3	6						Not Applicable	9999
A00038441	104	3	6						Don't Know	DK
A00014830	99	5	4						Missing Data	MD
A00024959	128	4	5
A00024568	98	4	5
A00024228	103	4	6
A00024198	78	8	4			Your highest level of Occupation		CODEM_8	higher executives, proprietors of large concerns, and major professionals	1
A00016197	99	4	6						business managers, proprietors of medium-sized business, and lesser professionals	2
A00023158	105	4	7						administrative personnel, small independent businesses, and minor professionals	3
A00020787	116	4	n/a						clerical and sales workers, technicians, owners of small businesses and minor professionals	4
A00023590	130	4	7						skilled manual employees	5
A00024684	118	7	4						machine operators and semi-skilled employees	6
A00000838	108	4	MD						unskilled employees	7
A00014607	103	3	5						Not Applicable	9999
A00001251	84	4	5						Don't Know	DK
A00015201	90	4	5						Missing Data	MD
A00028404	91	4	4
A00023131	100	5	4
A00028052	86	4	4
A00028409	120	3	4
A00029226	71	3	4
A00029452	128	6	3
A00035751	113	6	2
A00036844	107	2	7
A00037238	102	4	4
A00037495	117	4	4
A00037665	124	4	4
A00014898	125	6	4
A00024663	130	6	2
A00024932	114	7	2
A00024820	114	4	4
A00025969	109	4	3
A00024301	104	4	3
A00024372	125	7	4
A00024160	116	4	5
A00024535	96	4	6
A00023866	117	6	4
A00023800	115	6	4
A00023848	118	3	5
A00022915	133	6	5
A00022687	101	4	5
A00023095	126	4	6
A00022810	125	5	4
A00022509	129	6	4
A00022837	116	4	4
A00022400	96	3	4
A00021058	126	6	3
A00026945	107	6	3
A00021081	nan	6	4
A00020895	107	3	4
A00020805	125	4	5
A00020968	118	4	4
A00020984	120	3	3
A00023337	104	3	5
A00002198	nan	6	2
A00011265	92	4	4
A00012995	118	4	4
A00007409	114	5	3
A00000300	114	6	4

## Sheet: UCLA Demographics
	participant_id	race_3	race_main	gender	cigs	residence	language2	cigs_past	school_back	civil_stat	sexuality_opt	cigs_yrs	race_1	adopt	sexuality	religion	cigs_cigs	school_yrs	cigs_mons	school_degree	race_2	marriage_num	cigs_pack	age	children_num	ethnicity	language1
131	sub-50005	n/a	5	1	1	8	n/a	n/a	1	5	1	11	n/a	0	1	1	n/a	16	n/a	5	n/a	n/a	1	40	0	2	1
134	sub-50008	n/a	1	1	0	1	2	n/a	0	5	1	n/a	n/a	0	1	1	n/a	12	n/a	2	n/a	n/a	n/a	48	0	1	1
136	sub-50013	n/a	5	1	2	6	2	4	0	5	1	8	n/a	1	1	2	10	12	n/a	2	n/a	n/a	2	30	0	2	1
137	sub-50014	n/a	4	1	1	6	2	n/a	0	5	1	3	n/a	0	1	1	6	11	n/a	1	n/a	n/a	n/a	22	0	1	1
138	sub-50015	n/a	6	1	0	6	1	n/a	0	5	1	n/a	n/a	0	1	4	n/a	14	n/a	3	n/a	n/a	n/a	23	0	1	2
141	sub-50021	n/a	5	2	0	1	n/a	n/a	0	5	1	n/a	n/a	0	1	3	n/a	16	n/a	5	n/a	n/a	n/a	41	0	2	1
143	sub-50023	n/a	5	2	1	4	2	n/a	1	3	1	30	n/a	0	1	2	15	12	n/a	2	n/a	2	n/a	49	3	1	1
145	sub-50027	n/a	5	2	1	4	n/a	n/a	0	5	1	15	n/a	0	1	2	18	13	n/a	3	n/a	n/a	n/a	30	0	2	1
149	sub-50034	n/a	5	1	1	4	n/a	n/a	0	5	1	29	n/a	0	1	2	n/a	11	n/a	8	n/a	n/a	2	43	0	2	1
150	sub-50035	n/a	5	2	2	1	n/a	n/a	0	5	1	5	n/a	0	1	3	n/a	12	n/a	2	n/a	n/a	3	29	0	2	1
151	sub-50036	n/a	5	1	1	6	n/a	n/a	0	5	1	8	n/a	0	1	1	n/a	13	n/a	3	n/a	n/a	1	32	0	2	1
152	sub-50038	n/a	1	2	0	4	1	n/a	0	5	1	n/a	n/a	0	1	2	n/a	14	n/a	2	n/a	n/a	n/a	26	0	1	2
153	sub-50043	n/a	1	1	2	1	1	n/a	1	5	1	27	n/a	0	1	1	4	13	n/a	2	n/a	n/a	n/a	40	0	1	2
154	sub-50047	n/a	1	1	2	7	1	10	0	5	1	12	n/a	0	1	1	10	12	n/a	2	n/a	n/a	n/a	44	0	1	2
155	sub-50048	n/a	5	1	1	7	n/a	n/a	1	5	1	17	n/a	0	1	5	n/a	12	n/a	2	n/a	n/a	1	43	0	1	1
157	sub-50050	n/a	5	1	0	4	1	n/a	0	5	1	n/a	n/a	0	1	6	n/a	14	n/a	3	n/a	n/a	n/a	23	0	1	2
158	sub-50051	n/a	5	1	1	8	3	n/a	1	5	1	3	n/a	0	1	5	2	16	n/a	5	n/a	n/a	n/a	37	0	1	2
160	sub-50053	n/a	1	1	2	n/a	1	n/a	0	5	1	15	n/a	0	1	1	5	10	n/a	1	n/a	n/a	n/a	47	0	1	2
161	sub-50054	n/a	5	1	2	4	1	2	0	5	1	n/a	n/a	0	1	1	2	12	2	2	n/a	n/a	n/a	23	0	1	2
162	sub-50055	n/a	5	1	1	4	1	15	0	5	1	8	n/a	0	1	2	7	12	n/a	2	n/a	n/a	n/a	23	0	2	3
163	sub-50056	n/a	4	2	2	1	2	n/a	0	3	1	30	n/a	0	1	1	2	13	n/a	3	n/a	2	n/a	49	3	1	1
164	sub-50058	n/a	1	2	1	4	n/a	n/a	0	5	1	15	n/a	0	3	1	1	12	n/a	2	n/a	n/a	n/a	38	1	1	1
166	sub-50060	n/a	5	1	1	1	n/a	n/a	0	5	1	30	n/a	0	1	2	10	13	n/a	2	n/a	n/a	1	41	0	2	1
168	sub-50064	n/a	1	2	1	7	2	n/a	1	5	1	3	n/a	1	3	2	15	12	n/a	2	n/a	n/a	n/a	31	4	1	1
169	sub-50066	n/a	5	1	1	4	n/a	n/a	0	5	1	10	n/a	0	1	1	5	14	n/a	4	n/a	n/a	n/a	33	0	1	1
172	sub-50073	n/a	5	1	1	6	3	n/a	0	5	1	8	n/a	0	1	1	19	12	n/a	2	n/a	n/a	n/a	47	0	2	1
173	sub-50075	n/a	5	1	0	4	1	n/a	1	5	1	n/a	n/a	0	1	1	n/a	11	n/a	1	n/a	n/a	n/a	33	n/a	1	2
175	sub-50077	n/a	5	1	1	1	n/a	n/a	0	5	1	10	n/a	0	1	2	n/a	12	n/a	2	n/a	n/a	1	29	0	2	1
177	sub-50081	n/a	5	1	2	6	n/a	2	1	5	1	12	n/a	0	1	1	13	12	n/a	2	n/a	n/a	n/a	32	0	1	1
179	sub-50085	n/a	1	1	0	4	2	n/a	0	5	1	n/a	n/a	0	1	1	n/a	12	n/a	2	n/a	n/a	n/a	25	0	1	1
4	sub-10206	n/a	1	1	0	4	1	n/a	0	5	1	n/a	n/a	0	1	1	n/a	13	n/a	3	n/a	n/a	n/a	21	0	1	2
6	sub-10225	n/a	5	1	0	6	n/a	n/a	0	5	1	n/a	n/a	0	1	2	n/a	14	n/a	4	n/a	n/a	n/a	35	0	2	1
7	sub-10227	n/a	5	2	1	3	n/a	n/a	0	1	1	13	n/a	0	1	1	10	16	n/a	5	n/a	1	n/a	31	0	2	1
9	sub-10235	n/a	5	1	0	6	1	n/a	0	5	1	n/a	n/a	0	1	1	n/a	15	n/a	3	n/a	n/a	n/a	22	0	1	2
10	sub-10249	n/a	5	1	1	1	n/a	n/a	0	5	1	15	n/a	0	1	1	n/a	12	n/a	2	n/a	n/a	1	28	0	2	1
13	sub-10273	n/a	5	2	0	1	n/a	n/a	0	5	1	n/a	n/a	0	1	1	n/a	16	n/a	5	n/a	n/a	n/a	30	0	2	1
14	sub-10274	n/a	5	1	2	6	n/a	0.17	0	3	1	5	n/a	0	1	2	10	14	n/a	3	n/a	1	n/a	43	0	2	1
15	sub-10280	n/a	1	1	0	1	1	n/a	0	2	1	n/a	n/a	0	1	1	n/a	14	n/a	3	n/a	1	n/a	27	0	1	2
16	sub-10290	n/a	5	1	0	6	3	n/a	0	5	1	n/a	n/a	0	1	2	n/a	13	n/a	3	n/a	n/a	n/a	48	0	2	1
17	sub-10292	n/a	5	1	0	2	n/a	n/a	0	5	1	n/a	n/a	0	1	1	n/a	16	n/a	5	n/a	n/a	n/a	49	0	2	1
21	sub-10321	n/a	5	1	0	6	n/a	n/a	0	5	1	n/a	n/a	1	1	2	n/a	13	n/a	3	n/a	n/a	n/a	34	0	2	1
23	sub-10329	n/a	5	1	0	6	n/a	n/a	0	5	1	n/a	n/a	0	1	5	n/a	17	n/a	5	n/a	n/a	n/a	22	0	2	1
24	sub-10339	n/a	5	2	1	2	-9999	n/a	0	5	1	20	n/a	0	1	3	7	14	n/a	4	n/a	n/a	n/a	45	0	2	1
25	sub-10340	n/a	5	1	0	6	n/a	n/a	0	5	1	n/a	n/a	0	1	2	n/a	18	n/a	6	n/a	n/a	n/a	32	0	2	1
26	sub-10345	n/a	5	1	2	6	n/a	1	0	5	1	5	n/a	1	1	2	n/a	16	n/a	5	n/a	n/a	1	25	0	2	1
28	sub-10356	n/a	5	2	0	1	n/a	n/a	0	5	1	n/a	n/a	0	1	3	n/a	14	n/a	3	n/a	n/a	n/a	43	0	2	1
31	sub-10376	n/a	5	2	2	3	n/a	2	0	5	1	10	n/a	0	1	5	7	13	n/a	3	n/a	n/a	n/a	42	1	2	1
32	sub-10377	n/a	5	1	1	1	n/a	n/a	0	2	1	15	n/a	1	1	5	5	12	n/a	2	n/a	2	n/a	49	1	2	1
33	sub-10388	n/a	5	2	0	3	2	n/a	0	1	1	n/a	n/a	0	1	2	n/a	17	n/a	5	n/a	1	n/a	50	3	2	1
36	sub-10438	n/a	5	1	0	4	3	n/a	0	5	1	n/a	n/a	0	1	3	n/a	16	n/a	5	n/a	n/a	n/a	25	0	2	1
38	sub-10448	n/a	5	1	0	3	n/a	n/a	0	1	1	n/a	n/a	0	1	5	n/a	18	n/a	6	n/a	1	n/a	37	0	2	1
39	sub-10455	n/a	5	1	0	6	2	n/a	0	5	1	n/a	n/a	0	1	3	n/a	16	n/a	5	n/a	n/a	n/a	25	0	2	1
41	sub-10471	n/a	5	2	2	1	n/a	9	0	5	1	2	n/a	0	1	5	2	16	n/a	5	n/a	n/a	n/a	30	0	2	1
43	sub-10487	n/a	1	1	0	1	1	n/a	0	5	1	n/a	n/a	0	1	1	n/a	16	n/a	5	n/a	n/a	n/a	31	0	1	2
46	sub-10506	n/a	5	1	0	6	n/a	n/a	0	5	1	n/a	n/a	0	3	2	n/a	13	n/a	2	n/a	n/a	n/a	25	0	2	1
48	sub-10523	n/a	5	1	0	6	n/a	n/a	0	5	1	n/a	n/a	0	1	2	n/a	15	n/a	2	n/a	n/a	n/a	24	0	2	1
50	sub-10525	n/a	5	1	1	6	3	n/a	0	5	1	n/a	n/a	0	1	1	3	16	n/a	5	n/a	n/a	n/a	24	0	2	1
51	sub-10527	n/a	1	1	0	6	1	n/a	0	3	1	n/a	n/a	0	1	2	n/a	14	n/a	3	n/a	1	n/a	24	0	1	2
52	sub-10530	n/a	5	1	0	3	n/a	n/a	0	1	1	n/a	n/a	0	1	1	n/a	14	n/a	3	n/a	1	n/a	23	0	2	1
53	sub-10557	n/a	5	1	0	6	n/a	n/a	0	5	1	n/a	n/a	0	1	6	n/a	16	n/a	5	n/a	n/a	n/a	26	0	2	1
55	sub-10570	n/a	5	2	2	4	n/a	1	0	5	1	6	n/a	0	2	2	3	13	n/a	3	n/a	n/a	n/a	32	0	2	1
56	sub-10575	n/a	5	1	0	4	3	n/a	1	5	1	n/a	n/a	0	1	5	n/a	16	n/a	5	n/a	n/a	n/a	23	0	2	1
57	sub-10624	n/a	5	1	0	1	n/a	n/a	0	5	1	n/a	n/a	0	1	5	n/a	13	n/a	2	n/a	n/a	n/a	28	0	2	1
58	sub-10629	n/a	5	1	0	3	n/a	n/a	0	1	1	n/a	n/a	0	1	2	n/a	18	n/a	6	n/a	1	n/a	31	1	2	1
62	sub-10672	n/a	5	1	0	1	n/a	n/a	0	5	1	n/a	n/a	0	1	1	n/a	16	n/a	5	n/a	n/a	n/a	29	0	1	1
69	sub-10697	n/a	5	1	2	5	n/a	0.5	0	5	1	10	n/a	0	1	1	5	16	n/a	5	n/a	n/a	n/a	39	0	2	1
71	sub-10707	n/a	5	1	0	6	2	n/a	0	5	1	n/a	n/a	0	1	2	n/a	16	n/a	5	n/a	n/a	n/a	28	0	2	1
72	sub-10708	n/a	1	1	0	4	1	n/a	0	5	1	n/a	n/a	0	1	1	n/a	16	n/a	5	n/a	n/a	n/a	25	0	1	2
75	sub-10746	n/a	5	1	2	6	n/a	3	0	5	1	n/a	n/a	0	1	1	1	16	9	5	n/a	n/a	0	23	0	2	1
77	sub-10779	n/a	5	1	2	6	n/a	1.25	0	5	1	20	n/a	0	1	1	8	14	n/a	4	n/a	n/a	n/a	38	0	2	1
78	sub-10785	n/a	1	2	0	3	1	n/a	1	1	1	n/a	n/a	0	1	1	n/a	16	n/a	5	n/a	3	n/a	36	3	1	2
79	sub-10788	n/a	1	2	0	2	1	n/a	0	5	1	n/a	n/a	0	1	1	n/a	18	n/a	6	n/a	n/a	n/a	35	0	1	2
80	sub-10844	n/a	5	1	2	6	n/a	8	0	5	1	n/a	2	0	1	5	n/a	13	6	3	n/a	n/a	1	26	0	2	1
81	sub-10855	n/a	1	1	0	5	2	n/a	0	5	1	n/a	n/a	0	1	1	n/a	14	n/a	4	n/a	n/a	n/a	47	0	1	1
82	sub-10871	n/a	5	1	0	1	n/a	n/a	0	5	1	n/a	n/a	0	1	5	n/a	16	n/a	5	n/a	n/a	n/a	41	0	2	1
83	sub-10877	n/a	1	1	1	4	1	n/a	1	5	1	7	n/a	0	1	1	7	12	n/a	2	n/a	n/a	n/a	23	0	1	2
89	sub-10940	n/a	5	1	0	3	n/a	n/a	0	1	1	n/a	n/a	0	1	5	n/a	16	n/a	5	n/a	1	n/a	25	0	2	1
91	sub-10949	n/a	1	1	0	6	1	n/a	0	3	1	n/a	n/a	0	1	1	n/a	13	n/a	3	n/a	1	n/a	27	1	1	2
94	sub-10968	n/a	1	1	0	4	n/a	n/a	0	5	1	n/a	n/a	0	1	1	n/a	16	n/a	5	n/a	n/a	n/a	24	n/a	1	1
96	sub-10975	n/a	5	1	0	6	3	n/a	0	5	1	n/a	n/a	0	3	1	n/a	16	n/a	5	n/a	n/a	n/a	32	0	2	1
97	sub-10977	n/a	1	1	2	6	1	26	1	3	1	1	n/a	0	1	1	4	14	n/a	2	n/a	1	n/a	47	1	1	2
100	sub-11019	n/a	5	1	0	6	n/a	n/a	1	5	1	n/a	n/a	0	1	2	n/a	16	n/a	5	n/a	n/a	n/a	47	0	2	1
101	sub-11030	n/a	5	1	2	6	n/a	8	0	3	1	15	n/a	0	1	2	n/a	12	n/a	8	n/a	1	1	40	0	2	1
102	sub-11044	n/a	5	1	0	3	n/a	n/a	0	1	1	n/a	n/a	0	1	2	n/a	16	n/a	5	n/a	2	n/a	40	0	2	1
104	sub-11052	n/a	5	1	0	2	n/a	n/a	0	5	1	n/a	n/a	0	1	1	n/a	16	n/a	5	n/a	n/a	n/a	26	0	2	1
110	sub-11068	n/a	5	1	2	3	n/a	15	0	1	1	n/a	n/a	0	1	1	3	16	2	5	n/a	1	n/a	39	0	2	1
114	sub-11090	n/a	5	1	2	6	n/a	1	0	5	1	4	n/a	0	1	5	4	16	n/a	5	n/a	n/a	n/a	24	0	2	1
115	sub-11097	n/a	5	1	0	1	n/a	n/a	0	3	1	n/a	n/a	1	1	5	n/a	15	n/a	3	n/a	2	n/a	43	2	2	1
116	sub-11098	n/a	5	1	0	3	1	n/a	0	1	1	n/a	n/a	0	1	1	n/a	18	n/a	6	n/a	1	n/a	39	2	1	2
117	sub-11104	n/a	5	1	0	6	3	n/a	0	5	1	n/a	n/a	0	1	2	n/a	15	n/a	3	n/a	n/a	n/a	21	0	2	3
119	sub-11106	n/a	5	1	0	1	3	n/a	0	5	1	n/a	n/a	0	1	6	n/a	17	n/a	5	n/a	n/a	n/a	27	0	2	1
123	sub-11122	n/a	5	2	1	3	1	n/a	0	1	1	n/a	n/a	0	1	2	6	16	n/a	5	n/a	1	n/a	40	5	1	2
124	sub-11128	n/a	5	2	0	6	n/a	n/a	0	5	1	n/a	n/a	0	1	2	n/a	16	n/a	5	n/a	n/a	n/a	28	0	2	1
125	sub-11131	n/a	5	2	0	6	n/a	n/a	0	3	1	n/a	n/a	0	1	1	n/a	13	n/a	3	n/a	1	n/a	38	0	2	1
126	sub-11142	n/a	1	1	0	6	2	n/a	0	5	1	n/a	n/a	0	1	1	n/a	16	n/a	5	n/a	n/a	n/a	24	0	1	1
127	sub-11143	n/a	5	1	0	2	n/a	n/a	0	5	1	n/a	n/a	0	1	5	n/a	16	n/a	5	n/a	n/a	n/a	28	0	2	1
128	sub-11149	n/a	5	1	2	3	n/a	10	1	1	1	4	n/a	0	1	1	10	16	n/a	5	n/a	1	n/a	32	2	2	1

## Sheet: Sheet2
300
450
520
33.5
100
0
80.4
33.5
307
200
1400
1330
300
600
50
600
400
0
300
600
150
320
na
200
300
60
240
150
na
na
na
na
120
240
na
300
na
33.5
300
286.55
312
nan
600
400
400
266
nan
400
266
100
1066
200
400
333
nan
300
nan
300
300
nan
500
nan
125
533
nan
nan
100
600
900
600
240
300
600
300
640
300
60
240
nan
175
640
50
175
515
75
25
320
100
240
nan
940
300
1000
33.5
75
300
600
583
133
300
266
133
133
200
900
666
0
532
27
0
3200
300
200
200
33
400
1000
333
150
600
0
433
0
300
0
1466
nan
